# Supplementary material for: The nutritional composition of Australian native grains used by First Nations people and their re-emergence for human health and sustainable food systems
Source: Frontiers journal article supplement (doi:10.3389/fsufs.2023.1237862), 2023-08-08
Supplement: Table_1.DOCX [file Table_1.DOCX]

**Appendix 1.** Chromatographs for Native_7 (a), Native_3 (b), and *Oryza sativa* (c) demonstrating the peak retention times and relative similarity in composition between these samples, and also the dissimilarity in absorbance strength (shown on vertical axis). Peaks are labelled in diagram (a) according to their corresponding fatty acid. Horizontal axis is the retention time, vertical axis is the absorbance, area under peak corresponds to amount of fatty acid.
